# Supplementary material for: Comprehensive analysis of protein interactions between JAZ proteins and bHLH transcription factors that negatively regulate jasmonate signaling
Source: PubMed Central journal article supplement — Plant Signal Behav. 2014 Jan 6;9:e27639. doi: 10.4161/psb.27639 (PMC4091383; doi:10.4161/psb.27639), 2014-01-06
Supplement: psb-9-e27639-s01.pdf [file psb-9-e27639-s01.pdf]

## **Supplemental Material to:**

**Yuko Sasaki-Sekimoto\*, Hikaru Saito, Shinji Masuda,  
Ken Shirasu, and Hiroyuki Ohta**

**Comprehensive analysis of protein interactions between  
JAZ proteins and bHLH transcription factors that  
negatively regulate jasmonate signaling**

**Plant Signaling & Behavior 2013; 8(12)**

**<http://dx.doi.org/10.4161/psb.27639>**

**[www.landesbioscience.com/journals/psb/article/27639](http://www.landesbioscience.com/journals/psb/article/27639)**

**Supplemental Table 1** Primers for PCR-mediated amplification

| Primer                         | Sequence (5'-3')                   |
|--------------------------------|------------------------------------|
| <b>For BP Gateway cloning:</b> |                                    |
| JAM1 F                         | AAAAAGCAGGCTTGAATATGAGTGATTTA      |
| JAM1 R                         | AGAAAGCTGGGTATATATCACCCAGAGACC     |
| JAM1 ΔN F                      | AAAAAGCAGGCTGCGGTCCTGGGAGGTG       |
| JAM1 ΔN R                      | AGAAAGCTGGGTATATATCACCCAGAGACC     |
| JAM1 ΔC F                      | AAAAAGCAGGCTTGAATATGAGTGATTTA      |
| JAM1 ΔC R                      | AGAAAGCTGGGTGTGTGTAACCAAATGTTGG    |
| JAM2 F                         | AAAAAGCAGGCTTGAATATTGGTCGCCTAGT    |
| JAM2 R                         | AGAAAGCTGGGTATCTACCTGATGATGTTCTT   |
| JAM3 F                         | AAAAAGCAGGCTTGGGTCAAAGTTTTGGGA     |
| JAM3 R                         | AGAAAGCTGGGTACTGTGATAGAGAGGCAAG    |
| MYC2 F                         | AAAAAGCAGGCTTGACTGATTACCGGCTAC     |
| MYC2 R                         | AGAAAGCTGGGTAACCGATTTTTGAAATCAAAC  |
| JAZ1 F                         | AAAAAGCAGGCTTGTGCGAGTTCTATGGAATGT  |
| JAZ1 R                         | AGAAAGCTGGGTATATTTTCAGTGCTAAACCG   |
| JAZ2 F                         | AAAAAGCAGGCTTGTGCGAGTTTTCTGCCGA    |
| JAZ2 R                         | AGAAAGCTGGGTACCGTGAAGTGAAGCAAG     |
| JAZ3 F                         | AAAAAGCAGGCTTGTGTCATCACTTCTCTATATC |
| JAZ3 R                         | AGAAAGCTGGGTAGTATGCTCTTTTGAACATAA  |
| JAZ4 F                         | AAAAAGCAGGCTTGGATTGGTCAATTCTCAAG   |
| JAZ4 R                         | AGAAAGCTGGGTAGTGCAGATGATGAGCTG     |
| JAZ5 F                         | AAAAAGCAGGCTTGTGCTCGAGCAATGAAAAT   |
| JAZ5 R                         | AGAAAGCTGGGTATAGCCTTAGATCGAGATC    |
| JAZ6 F                         | AAAAAGCAGGCTTGTCAACGGGACAAGCG      |
| JAZ6 R                         | AGAAAGCTGGGTAAGCTTGAGTTCAAGGTTT    |
| JAZ7 F                         | AAAAAGCAGGCTTGATCATCATCAAAAAC      |
| JAZ7 R                         | AGAAAGCTGGGTATCGGTAACGGTGGTAAG     |
| JAZ8 F                         | AAAAAGCAGGCTTGAAGCTACAGCAAAATTGT   |
| JAZ8 R                         | AGAAAGCTGGGTATCGTCTGAATGGTACG      |
| JAZ9 F                         | AAAAAGCAGGCTTGGAAAGAGATTTTCTGGG    |
| JAZ9 R                         | AGAAAGCTGGGTTAAGCCTCTCTTTGCGCTT    |
| JAZ10 F                        | AAAAAGCAGGCTTGTGCAAAGCTACCATAGAA   |
| JAZ10 R                        | AGAAAGCTGGGTATGTCACAATGGGGCTGG     |
| JAZ11 F                        | AAAAAGCAGGCTTGGCTGAGGTAACGGAG      |
| JAZ11 R                        | AGAAAGCTGGGTATGTCACAATGGGGCTGG     |
| JAZ12 F                        | AAAAAGCAGGCTTGAAGTAAAGATGAG        |
| JAZ12 R                        | AGAAAGCTGGGTAAGCAGTTGAAATTCCTC     |
| <b>For qRT-PCR analysis:</b>   |                                    |
| ACTIN2 F                       | AGTGCTCGTACAACCGGTATTGT            |
| ACTIN2 R                       | GATGGCATGAGGAAGAGAGAAAC            |
| JAZ1 F                         | GAGCAAAGGCACCGCTAATA               |
| JAZ1 R                         | TCCGATAGTAGCGATGTTGC               |
